# Supplementary material for: Enhanced Expression of Human Endogenous Retroviruses, TRIM28 and SETDB1 in Autism Spectrum Disorder
Source: MDPI journal article supplement (doi:10.3390/ijms23115964), 2022-05-25
Supplement: s1 [file s1]

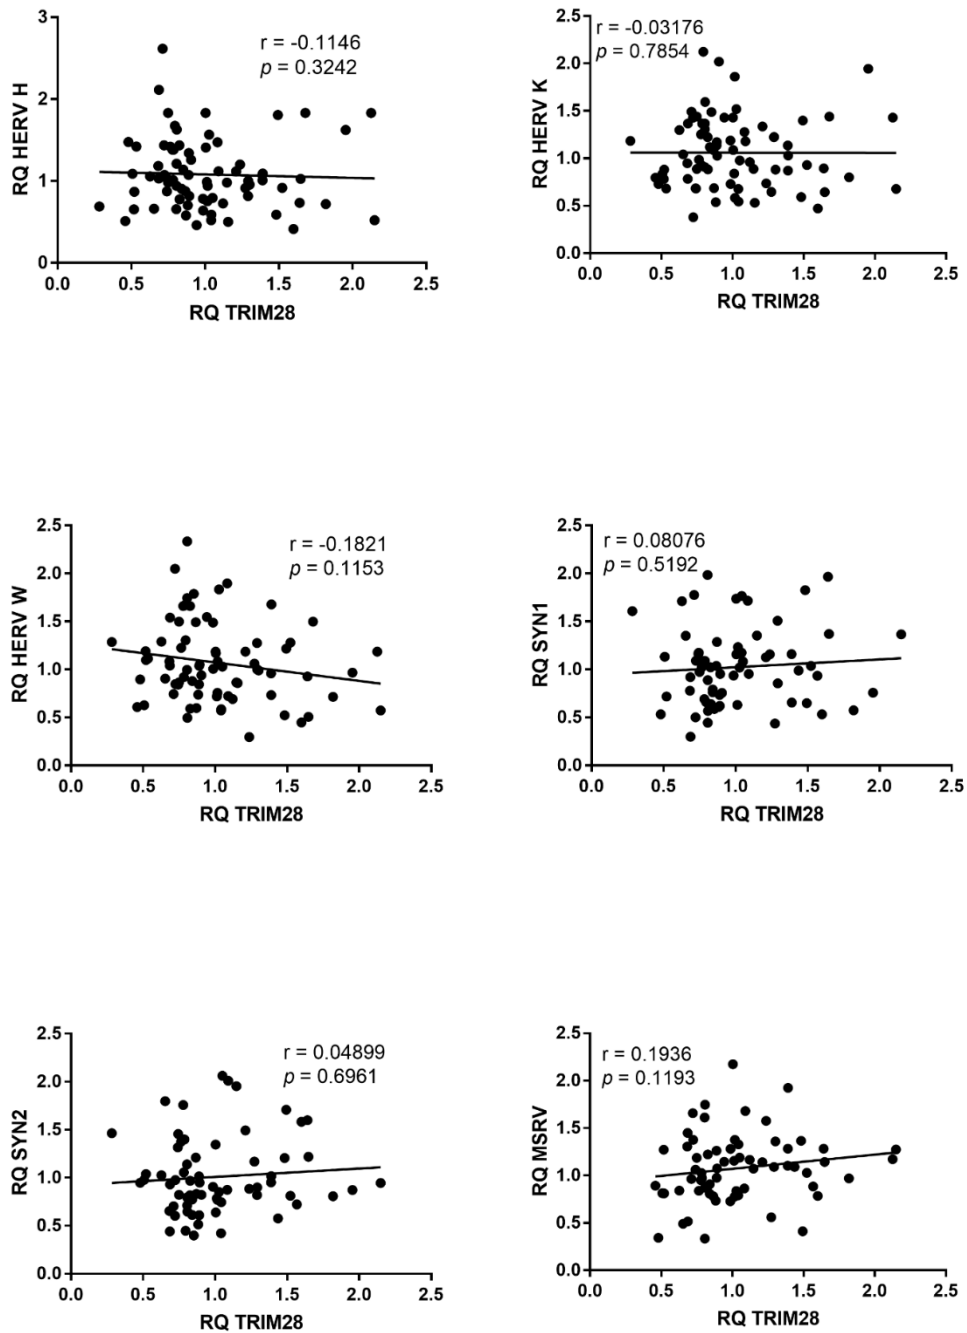

**Figure S1.** Correlations between transcription levels of TRIM28 and HERV sequences in whole blood from 79 healthy children (HC).

RQ: Relative Quantification. Circles show the mean of three individual measurements. Line: Linear regression line. Statistical analysis: Spearman correlation test.

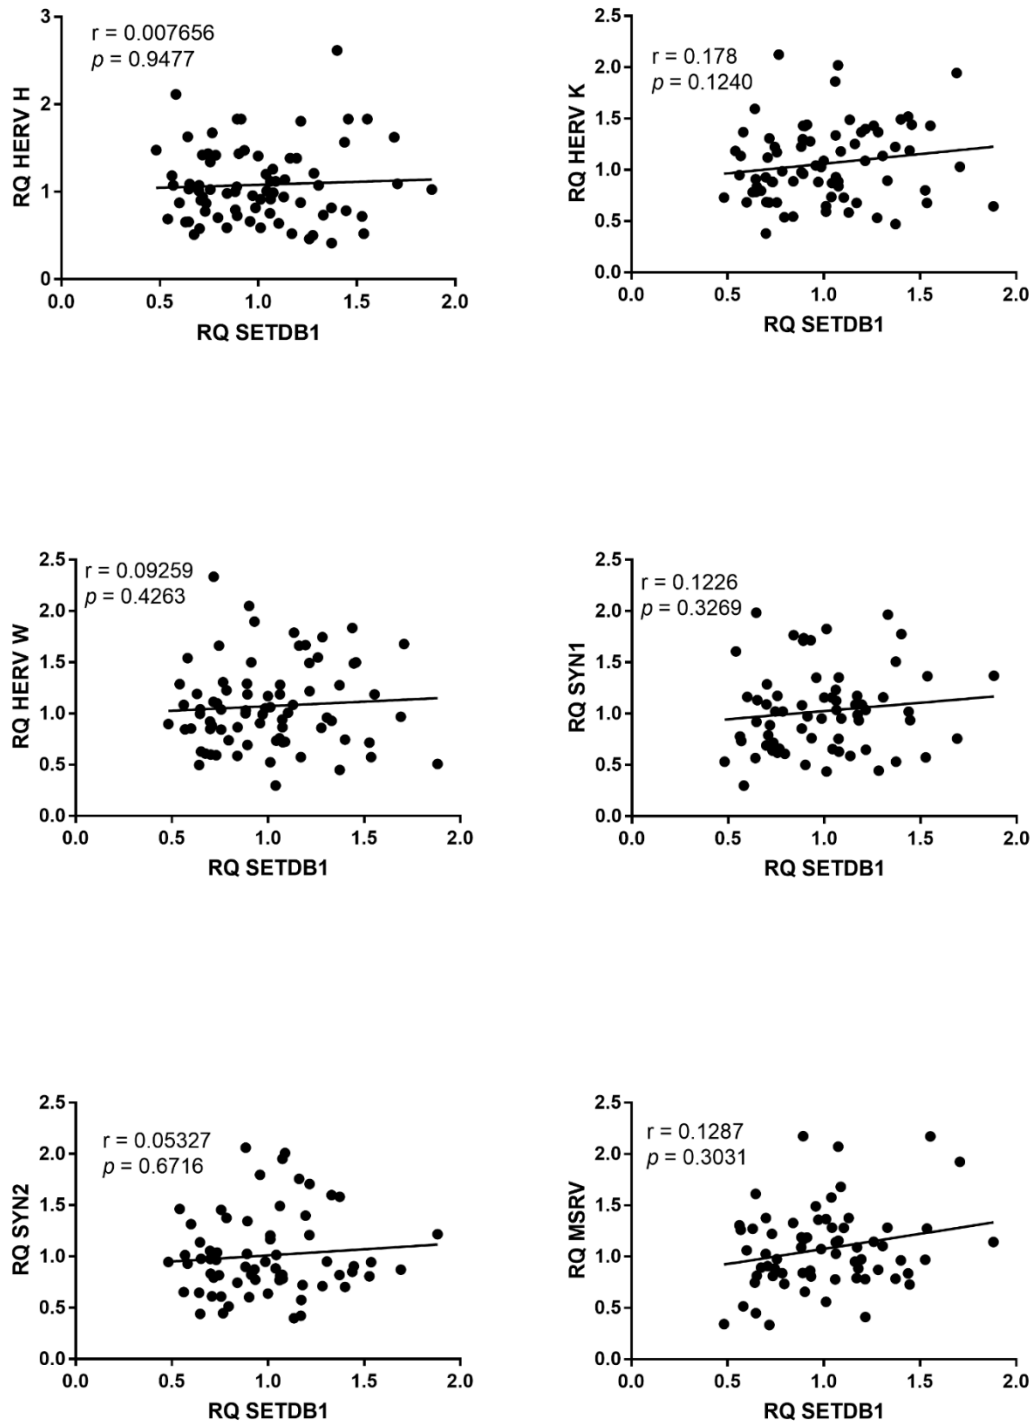

**Figure S2.** Correlations between transcription levels of SETDB1 and HERV sequences in whole blood from 79 healthy children (HC).

RQ: Relative Quantification. Circles show the mean of three individual measurements. Line: Linear regression line. Statistical analysis: Spearman correlation test.
